# Supplementary material
Source: HighWire-hosted journal article supplement (https://jitc.bmj.com/content/10/1/e003325)
Supplement: inline-supplementary-material-2 [file inline-supplementary-material-2.xlsx]

## Sheet: Table S1
Table S1. Clinical characteristics of breast cancer patients
Patient	Primary tumor sample	Sentinel lymph node sample	Pathologic diagnoses	Gender	Age	Diabetes mellitus	Procedure	Location	Maximum Diameter(mm)	TNM Classification	Staging	Perineural invasion	Vascular invasion	Peripancreatic infiltarion	Number of metastatic lymph nodes	ER	PR	HER2	Ki67	Molecular subtype
P1	CA1	LN1	Invasive ductal carcinoma	Female	58	No	Modified radical operation	Right breast，inner upper quadrant，distance from nipple: 50mm	14	T1N2M0	IIA	N o	N o	No	3	0	0	+++	0.15	HER-2-overexpression
P2	CA2	LN2	Invasive ductal carcinoma	Female	66	No	Modified radical operation	Right breast，inner lower quadrant，distance from nipple: 35mm	17	T1N2M0	IIA	No	No	No	2	80%+	5%+	+	0.3	Luminal
P3	CA3	LN3	Invasive ductal carcinoma	Female	56	No	Breast Conservation Therapy	Left breast， outer upper quadrant，distance from nipple: 50mm	24	T2N1M0	IIB	No	No	No	1	90%+	10%+	0	0.25	Luminal
P4	CA4	LN4	Invasive ductal carcinoma	Female	47	No	Breast Conservation Therapy	Left breast，outer upper quadrant，distance from nipple: 30mm	19	T1N2M0	IIA	No	No	No	6	90%+	80%+	0	0.12	Luminal
P5	CA5	LN5	Invasive ductal carcinoma	Female	55	No	Modified radical operation	Left breast， outer upper quadrant， distance from nipple: 5mm	20	T1N2M0	IIA	No	No	No	5	90%+	35%+	++	0.4	Luminal
